# Supplementary material for: Adverse Effects on the Thyroid of Chinese Pregnant Women Exposed to Long-Term Iodine Excess: Optimal and Safe Tolerable Upper Intake Levels of Iodine
Source: MDPI journal article supplement (doi:10.3390/nu15071635), 2023-03-28
Supplement: s1 [file s1]

**Supplementary Table S1.** Logistic regressions of UIE for thyroid dysfunction (N = 744).

|                       | Unadjusted |          |     | Adjusted * |
|-----------------------|------------|----------|-----|------------|
|                       | OR         | 95% CI   | OR  | 95% CI     |
| Model 1: UIE (µg/day) |            |          |     |            |
| <150                  | 1.6        | 0.6–3.9  | 1.7 | 0.7–4.6    |
| 150–250               | Ref        | -        | Ref | -          |
| 250–350               | 1.5        | 0.5–4.9  | 1.4 | 0.4–5.0    |
| 350–450               | 1.4        | 0.4–5.7  | 1.7 | 0.4–7.0    |
| 450–550               | 6.4        | 2.1–19.7 | 5.7 | 1.7–19.2   |
| ≥550                  | 3.8        | 1.5–9.5  | 3.9 | 1.5–10.3   |
| Model 2: UIE (µg/day) |            |          |     |            |
| <100                  | 1.9        | 0.7–5.1  | 2.3 | 0.8–6.3    |
| 100–200               | Ref        | -        | Ref | -          |
| 200–300               | 1.7        | 0.6–4.7  | 1.5 | 0.5–4.6    |
| 300–400               | 1.9        | 0.5–6.4  | 2.2 | 0.6–7.8    |
| 400–500               | 4.5        | 1.5–13.6 | 4.3 | 1.3–14.3   |
| 500–600               | 4.4        | 1.2–15.7 | 4.7 | 1.3–17.4   |
| ≥600                  | 4.4        | 1.8–10.8 | 4.5 | 1.8–11.6   |

\* Logistic regression was adjusted BMI, age, and trimester of pregnancy.  
UIE, urinary iodine excretion; BMI, body mass index.

**Supplementary Table S2.** the rate of thyroid dysfunction with different UIE level.

| UIE (µg/d) | n   | Number of Cases | Rate (%) |
|------------|-----|-----------------|----------|
| <50        | 28  | 4               | 14.29    |
| 50–100     | 110 | 5               | 4.55     |
| 100–150    | 129 | 7               | 5.43     |
| 150–200    | 99  | 1               | 1.01     |
| 200–250    | 81  | 6               | 7.41     |
| 250–300    | 54  | 2               | 3.70     |
| 300–350    | 33  | 3               | 9.09     |
| 350–400    | 30  | 1               | 3.33     |
| 400–450    | 25  | 2               | 8.00     |
| 450–500    | 18  | 4               | 22.22    |
| 500–550    | 16  | 3               | 18.75    |
| 550–600    | 13  | 1               | 7.69     |
| ≥600       | 108 | 15              | 13.89    |

UIE, urinary iodine excretion.
